# Supplementary material for: Lipopolysaccharide-activated macrophages regulate the osteogenic differentiation of bone marrow mesenchymal stem cells through exosomes
Source: PeerJ. 2022 May 13;10:e13442. doi: 10.7717/peerj.13442 (PMC9109694; doi:10.7717/peerj.13442)
Supplement: Supplemental Information 1 [file peerj-10-13442-s001.xls]

## Sheet: TNF-α
	q-PCR(Figure 1A)
	sample	Target	CT	mean		CT	mean	Δt	Δt	meanΔt	ΔΔt	2-ΔΔCT
	control	GAPDH	13.735	13.8534	TNF-a	20.228	20.3242	6.493	6.493	6.4708	0.022201	0.984729
	control	GAPDH	13.797		TNF-a	20.245		6.448	6.448		-0.0227991	1.01593
	control	GAPDH	13.836		TNF-a	20.317		6.481	6.481		0.010199	0.992956
	control	GAPDH	13.909		TNF-a	20.369		6.46	6.46		-0.0108009	1.00751
	control	GAPDH	13.99		TNF-a	20.462		6.472	6.472		0.0012001	0.999168
	1h	GAPDH	13.599	13.7618	TNF-a	17.812	17.9122	4.213	4.213	4.1504	-2.28	4.85678
	1h	GAPDH	13.642		TNF-a	17.843		4.201	4.201		-2.247	4.74695
	1h	GAPDH	13.781		TNF-a	17.904		4.123	4.123		-2.358	5.12659
	1h	GAPDH	13.815		TNF-a	17.924		4.109	4.109		-2.351	5.10177
	1h	GAPDH	13.972		TNF-a	18.078		4.106	4.106		-2.366	5.1551
	3h	GAPDH	13.136	13.2276	TNF-a	17.002	17.1024	3.866	3.866	3.8748	-2.627	6.1774
	3h	GAPDH	13.203		TNF-a	17.052		3.849	3.849		-2.599	6.05867
	3h	GAPDH	13.205		TNF-a	17.088		3.883	3.883		-2.598	6.05447
	3h	GAPDH	13.289		TNF-a	17.152		3.863	3.863		-2.597	6.05026
	3h	GAPDH	13.305		TNF-a	17.218		3.913	3.913		-2.559	5.89299
	6h	GAPDH	13.31	13.3938	TNF-a	16.96	17.4058	3.65	3.65	4.012	-2.843	7.17512
	6h	GAPDH	13.333		TNF-a	17.465		4.132	4.132		-2.316	4.9795
	6h	GAPDH	13.387		TNF-a	17.49		4.103	4.103		-2.378	5.19815
	6h	GAPDH	13.425		TNF-a	17.624		4.199	4.199		-2.261	4.79323
	6h	GAPDH	13.514		TNF-a	17.49		3.976	3.976		-2.496	5.64119
	12h	GAPDH	14.34	14.4344	TNF-a	19.811	19.9812	5.471	5.471	5.5468	-1.022	2.03073
	12h	GAPDH	14.442		TNF-a	19.892		5.45	5.45		-0.998001	1.99723
	12h	GAPDH	14.447		TNF-a	19.951		5.504	5.504		-0.976998	1.96837
	12h	GAPDH	14.456		TNF-a	19.953		5.497	5.497		-0.963	1.94936
	12h	GAPDH	14.487		TNF-a	20.299		5.812	5.812		-0.660001	1.58008
	24h	GAPDH	13.783	13.8456	TNF-a	19.855	19.9672	6.072	6.072	6.1216	-0.421001	1.33886
	24h	GAPDH	13.792		TNF-a	19.867		6.075	6.075		-0.373	1.29504
	24h	GAPDH	13.852		TNF-a	19.891		6.039	6.039		-0.441998	1.35848
	24h	GAPDH	13.89		TNF-a	19.956		6.066	6.066		-0.394	1.31403
	24h	GAPDH	13.911		TNF-a	20.267		6.356	6.356		-0.116	1.08373

## Sheet: IL-6
	q-PCR(Figure 1B)
	sample	Target	CT	mean		CT	mean	Δt	Δt	meanΔt	ΔΔt	2-ΔΔCT
	control	GADPH	16.071	16.038	IL-6(2)	31.501	31.8803	15.43	15.43	15.8423	-0.412334	1.33084
	control	GADPH	16.057		IL-6(2)	31.747		15.69	15.69		-0.152334	1.11137
	control	GADPH	15.986		IL-6(2)	32.393		16.407	16.407		0.564667	0.676111
	1h	GADPH	15.897	15.8943	IL-6(2)	30.547	30.5157	14.65	14.65	14.6213	-0.78	1.71713
	1h	GADPH	15.929		IL-6(2)	30.179		14.25	14.25		-1.44	2.71321
	1h	GADPH	15.857		IL-6(2)	30.821		14.964	14.964		-1.443	2.71886
	3h	GADPH	15.443	15.5473	IL-6(2)	26.545	26.5533	11.102	11.102	11.006	-4.328	20.0844
	3h	GADPH	15.635		IL-6(2)	26.404		10.769	10.769		-4.921	30.2949
	3h	GADPH	15.564		IL-6(2)	26.711		11.147	11.147		-5.26	38.3193
	6h	GADPH	15.353	15.3373	IL-6(2)	26.853	27.1773	11.5	11.5	11.84	-3.93	15.2422
	6h	GADPH	15.325		IL-6(2)	27.29		11.965	11.965		-3.725	13.2232
	6h	GADPH	15.334		IL-6(2)	27.389		12.055	12.055		-4.352	20.4213
	12h	GADPH	15.118	15.1827	IL-6(2)	27.028	26.9357	11.91	11.91	11.753	-3.52	11.4716
	12h	GADPH	15.261		IL-6(2)	26.94		11.679	11.679		-4.011	16.1225
	12h	GADPH	15.169		IL-6(2)	26.839		11.67	11.67		-4.737	26.6673
	24h	GADPH	15.747	15.5637	IL-6(2)	26.453	26.3233	10.706	10.706	10.7597	-4.724	26.4281
	24h	GADPH	15.57		IL-6(2)	26.346		10.776	10.776		-4.914	30.1482
	24h	GADPH	15.374		IL-6(2)	26.171		10.797	10.797		-5.61	48.8403
