# Supplementary material for: Lipopolysaccharide-activated macrophages regulate the osteogenic differentiation of bone marrow mesenchymal stem cells through exosomes
Source: PeerJ. 2022 May 13;10:e13442. doi: 10.7717/peerj.13442 (PMC9109694; doi:10.7717/peerj.13442)
Supplement: Supplemental Information 2 [file peerj-10-13442-s002.xls]

## Sheet: TNF-α
	Figure 1C
	ELISA（TNF-α）1
	sample	standard1	standard2	standard3	standard4	standard5	standard6	sample 24H	sample 48H	sample C
	OD value	0.0847	0.3786	0.6702	1.1521	1.9375	2.4198	0.8512	0.8955	0.6728
	Zero OD value	0	0.2939	0.5855	1.0674	1.8528	2.3351	0.7665	0.8108	0.5881
	Protein concentration	0	50	100	200	400	800	178	192	122
	ELISA（TNF-α）2
	sample	standard1	standard2	standard3	standard4	standard5	standard6	sample 24H	sample 48H	sample C
	OD value	0.0838	0.4705	0.6018	1.0676	1.9656	2.4325	0.913	1.0098	0.6607
	Zero OD value	0	0.3867	0.518	0.9838	1.8818	2.3487	0.8292	0.926	0.5769
	Protein concentration	0	50	100	200	400	800	198.5	228.8	119
	ELISA（TNF-α）3
	sample	standard1	standard2	standard3	standard4	standard5	standard6	sample 24H	sample 48H	sample C
	OD value	0.0802	0.4705	0.6702	1.2246	1.9656	2.4198	0.9452	1.0098	0.5942
	Zero OD value	0	0.3903	0.59	1.1444	1.8854	2.3396	0.865	0.9296	0.514
	Protein concentration	0	50	100	200	400	800	197.7	217.9	87.5

## Sheet: IL-6
	Figure 1D
	ELISA（IL-6）1
	sample	standard1	standard2	standard3	standard4	standard5	standard6	sample 24H	sample 48H	sample C
	OD value	0.0811	0.74725	1.13665	2.08475	2.45145	2.56215	1.0845	0.92045	0.813
	Zero OD value	0	0.66615	1.05555	2.00365	2.37035	2.48105	1.0034	0.83935	0.7319
	Protein concentration	0	7.5	15	30	60	120	22.95	16.87	12.89
	ELISA（IL-6）2
	sample	standard1	standard2	standard3	standard4	standard5	standard6	sample 24H	sample 48H	sample C
	OD value	0.0833	0.9184	1.169	1.8969	2.4882	2.5617	1.0574	0.9674	0.939
	Zero OD value	0	0.8351	1.0857	1.8136	2.4049	2.4784	0.9741	0.8841	0.8557
	Protein concentration	0	7.5	15	30	60	120	20.6	17.1	15.5
	ELISA（IL-6）3
	sample	standard1	standard2	standard3	standard4	standard5	standard6	sample 24H	sample 48H	sample C
	OD value	0.0789	0.5761	1.1043	2.2726	2.4147	2.5626	1.2016	0.7835	0.687
	Zero OD value	0	0.4972	1.0254	2.1937	2.3358	2.4837	1.1227	0.7046	0.6081
	Protein concentration	0	7.5	15	30	60	120	31.1	14.1	10.73
