# Supplementary material for: Lipopolysaccharide-activated macrophages regulate the osteogenic differentiation of bone marrow mesenchymal stem cells through exosomes
Source: PeerJ. 2022 May 13;10:e13442. doi: 10.7717/peerj.13442 (PMC9109694; doi:10.7717/peerj.13442)
Supplement: Supplemental Information 3 [file peerj-10-13442-s003.xlsx]

## Sheet: Sheet1
Size (nm) - events	Events - events
30.25	0
30.75	0		Figure 1F
31.25	0
31.75	0
32.25	0
32.75	0
33.25	0
33.75	0
34.25	0
34.75	0
35.25	0
35.75	0
36.25	0
36.75	0
37.25	0
37.75	0
38.25	0
38.75	0
39.25	0
39.75	0
40.25	0
40.75	0
41.25	0
41.75	0
42.25	0
42.75	0
43.25	0
43.75	0
44.25	0
44.75	0
45.25	0
45.75	0
46.25	0
46.75	0
47.25	0
47.75	0
48.25	0
48.75	0
49.25	0
49.75	0
50.25	0
50.75	0
51.25	2
51.75	1
52.25	0
52.75	1
53.25	4
53.75	11
54.25	5
54.75	6
55.25	9
55.75	11
56.25	7
56.75	5
57.25	20
57.75	24
58.25	15
58.75	23
59.25	3
59.75	33
60.25	19
60.75	28
61.25	22
61.75	28
62.25	37
62.75	34
63.25	38
63.75	30
64.25	36
64.75	38
65.25	45
65.75	24
66.25	44
66.75	37
67.25	27
67.75	35
68.25	56
68.75	66
69.25	56
69.75	52
70.25	58
70.75	69
71.25	42
71.75	34
72.25	50
72.75	39
73.25	34
73.75	37
74.25	28
74.75	31
75.25	32
75.75	32
76.25	20
76.75	23
77.25	22
77.75	22
78.25	29
78.75	27
79.25	18
79.75	26
80.25	11
80.75	23
81.25	14
81.75	20
82.25	13
82.75	17
83.25	15
83.75	19
84.25	18
84.75	17
85.25	10
85.75	13
86.25	12
86.75	14
87.25	15
87.75	10
88.25	16
88.75	14
89.25	10
89.75	12
90.25	8
90.75	10
91.25	11
91.75	17
92.25	15
92.75	6
93.25	19
93.75	12
94.25	11
94.75	11
95.25	14
95.75	14
96.25	14
96.75	15
97.25	19
97.75	13
98.25	16
98.75	18
99.25	18
99.75	17
100.25	22
100.75	21
101.25	22
101.75	15
102.25	24
102.75	30
103.25	19
103.75	23
104.25	32
104.75	25
105.25	21
105.75	23
106.25	11
106.75	18
107.25	14
107.75	14
108.25	10
108.75	6
109.25	10
109.75	5
110.25	9
110.75	10
111.25	8
111.75	7
112.25	9
112.75	3
113.25	3
113.75	1
114.25	6
114.75	3
115.25	7
115.75	2
116.25	1
116.75	9
117.25	1
117.75	3
118.25	5
118.75	6
119.25	4
119.75	0
120.25	10
120.75	1
121.25	1
121.75	4
122.25	1
122.75	1
123.25	2
123.75	0
124.25	3
124.75	1
125.25	1
125.75	4
126.25	2
126.75	4
127.25	3
127.75	4
128.25	2
128.75	4
129.25	2
129.75	3
130.25	1
130.75	2
131.25	2
131.75	1
132.25	0
132.75	1
133.25	4
133.75	4
134.25	0
134.75	2
135.25	0
135.75	1
136.25	0
136.75	0
137.25	0
137.75	2
138.25	2
138.75	0
139.25	1
139.75	0
140.25	1
140.75	2
141.25	0
141.75	1
142.25	0
142.75	0
143.25	0
143.75	1
144.25	0
144.75	0
145.25	0
145.75	0
146.25	0
146.75	0
147.25	0
147.75	2
148.25	1
148.75	0
149.25	0
149.75	1
