# Supplementary material for: Lipopolysaccharide-activated macrophages regulate the osteogenic differentiation of bone marrow mesenchymal stem cells through exosomes
Source: PeerJ. 2022 May 13;10:e13442. doi: 10.7717/peerj.13442 (PMC9109694; doi:10.7717/peerj.13442)
Supplement: Supplemental Information 4 [file peerj-10-13442-s004.xls]

## Sheet: Sheet1
	BCA
	sample	standard1	standard2	standard3	standard4	standard5	standard6	standard7	standard8	Exo
	OD value	0.1338	0.1522	0.1718	0.2052	0.2809	0.3456	0.4345	0.5208	0.8645
	OD value	0.126	0.1463	0.1627	0.2036	0.2834	0.3522	0.3958	0.4994	1.0846
	mean	0.1299	0.14925	0.16725	0.2044	0.28215	0.3489	0.41515	0.5101	0.9853
	Zero OD value	0	0.01935	0.03735	0.0745	0.15225	0.219	0.28525	0.3802	0.8554
	Protein concentration	0	0.025	0.05	0.1	0.2	0.3	0.4	0.5	1.1152
