# Supplementary material for: Lipopolysaccharide-activated macrophages regulate the osteogenic differentiation of bone marrow mesenchymal stem cells through exosomes
Source: PeerJ. 2022 May 13;10:e13442. doi: 10.7717/peerj.13442 (PMC9109694; doi:10.7717/peerj.13442)
Supplement: Supplemental Information 5 [file peerj-10-13442-s005.xls]

## Sheet: ALP
	Figure 3A							13.679
	Sample Name	Target Name	Task	Reporter	Quencher	Cт	GAPDH mean（ct）	ΔCT	ΔΔCT	负ΔΔCT	2-ΔΔCT	2-ΔΔCT Mean	Ct SD
	BMSCS+Com-Exo1	ALP	UNKNOWN	SYBR	None	31.5029		13.7439	0.0648962	-0.0648962	0.956014	1.00161	0.0705371		1.0029	0.04911	1	0.05	±	1±0.05
	BMSCS+Com-Exo1	ALP	UNKNOWN	SYBR	None	31.488		13.729	0.0499515	-0.0499515	0.965969
	BMSCS+Com-Exo1	ALP	UNKNOWN	SYBR	None	31.3232		13.5642	-0.114848	0.114848	1.08286
	BMSCS+Com-Exo1	GAPDH	UNKNOWN	SYBR	None	17.8566	17.759
	BMSCS+Com-Exo1	GAPDH	UNKNOWN	SYBR	None	17.7121
	BMSCS+Com-Exo1	GAPDH	UNKNOWN	SYBR	None	17.7085
	BMSCS+Com-Exo2	ALP	UNKNOWN	SYBR	None	31.4424		13.9118	0.232781	-0.232781	0.850993	0.954445	0.090496
	BMSCS+Com-Exo2	ALP	UNKNOWN	SYBR	None	31.1826		13.6519	-0.027056	0.027056	1.01893
	BMSCS+Com-Exo2	ALP	UNKNOWN	SYBR	None	31.2192		13.6885	0.00953827	-0.00953827	0.99341
	BMSCS+Com-Exo2	GAPDH	UNKNOWN	SYBR	None	17.9834	17.5307
	BMSCS+Com-Exo2	GAPDH	UNKNOWN	SYBR	None	17.3676
	BMSCS+Com-Exo2	GAPDH	UNKNOWN	SYBR	None	17.2411
	BMSCS+Com-Exo3	ALP	UNKNOWN	SYBR	None	30.7592		13.6781	-0.000858522	0.000858522	1.0006	1.05264	0.0782144
	BMSCS+Com-Exo3	ALP	UNKNOWN	SYBR	None	30.7389		13.6579	-0.0211093	0.0211093	1.01474
	BMSCS+Com-Exo3	ALP	UNKNOWN	SYBR	None	30.5677		13.4867	-0.1923	0.1923	1.14258
	BMSCS+Com-Exo3	GAPDH	UNKNOWN	SYBR	None	17.2053	17.081
	BMSCS+Com-Exo3	GAPDH	UNKNOWN	SYBR	None	17.1831
	BMSCS+Com-Exo3	GAPDH	UNKNOWN	SYBR	None	16.8547
	BMSCS+Inf-Exo1	ALP	UNKNOWN	SYBR	None	31.8235		14.4882	0.809216	-0.809216	0.570692	0.602839	0.0474554		0.542433	0.0558675	0.54	0.06	±	0.54±0.06
	BMSCS+Inf-Exo1	ALP	UNKNOWN	SYBR	None	31.7989		14.4637	0.784675	-0.784675	0.580483
	BMSCS+Inf-Exo1	ALP	UNKNOWN	SYBR	None	31.6195		14.2843	0.60528	-0.60528	0.657344
	BMSCS+Inf-Exo1	GAPDH	UNKNOWN	SYBR	None	17.2174	17.3352
	BMSCS+Inf-Exo1	GAPDH	UNKNOWN	SYBR	None	17.4575
	BMSCS+Inf-Exo1	GAPDH	UNKNOWN	SYBR	None	17.3308
	BMSCS+Inf-Exo2	ALP	UNKNOWN	SYBR	None	31.8807		14.6802	1.00119	-1.00119	0.499588	0.492622	0.0108778
	BMSCS+Inf-Exo2	ALP	UNKNOWN	SYBR	None	31.9382		14.7376	1.05863	-1.05863	0.480087
	BMSCS+Inf-Exo2	ALP	UNKNOWN	SYBR	None	31.8848		14.6842	1.00523	-1.00523	0.49819
	BMSCS+Inf-Exo2	GAPDH	UNKNOWN	SYBR	None	17.102	17.2006
	BMSCS+Inf-Exo2	GAPDH	UNKNOWN	SYBR	None	17.0693
	BMSCS+Inf-Exo2	GAPDH	UNKNOWN	SYBR	None	17.4303
	BMSCS+Inf-Exo3	ALP	UNKNOWN	SYBR	None	31.5859		14.505	0.826036	-0.826036	0.564077	0.531836	0.0399887
	BMSCS+Inf-Exo3	ALP	UNKNOWN	SYBR	None	31.7976		14.7167	1.03774	-1.03774	0.487089
	BMSCS+Inf-Exo3	ALP	UNKNOWN	SYBR	None	31.6372		14.5564	0.877411	-0.877411	0.544344
	BMSCS+Inf-Exo3	GAPDH	UNKNOWN	SYBR	None	17.2983	17.0808
	BMSCS+Inf-Exo3	GAPDH	UNKNOWN	SYBR	None	16.6779
	BMSCS+Inf-Exo3	GAPDH	UNKNOWN	SYBR	None	17.2662
	BMSCS+CM+GW4869 1	ALP	UNKNOWN	SYBR	None	29.707		12.3736	-1.30544	1.30544	2.47158	2.15727	0.30162		2.30774	0.202067	2.31	0.2	±	2.31±0.2
	BMSCS+CM+GW4869 1	ALP	UNKNOWN	SYBR	None	30.1093		12.7758	-0.903185	0.903185	1.87019
	BMSCS+CM+GW4869 1	ALP	UNKNOWN	SYBR	None	29.9216		12.5881	-1.09088	1.09088	2.13004
	BMSCS+CM+GW4869 1	GAPDH	UNKNOWN	SYBR	None	17.6496	17.3334
	BMSCS+CM+GW4869 1	GAPDH	UNKNOWN	SYBR	None	17.4458
	BMSCS+CM+GW4869 1	GAPDH	UNKNOWN	SYBR	None	16.9049
	BMSCS+CM+GW4869 2	ALP	UNKNOWN	SYBR	None	29.4702		12.487	-1.19196	1.19196	2.28464	2.22853	0.0920826
	BMSCS+CM+GW4869 2	ALP	UNKNOWN	SYBR	None	29.5766		12.5934	-1.0856	1.0856	2.12226
	BMSCS+CM+GW4869 2	ALP	UNKNOWN	SYBR	None	29.474		12.4908	-1.18821	1.18821	2.27869
	BMSCS+CM+GW4869 2	GAPDH	UNKNOWN	SYBR	None	16.7623	16.9832
	BMSCS+CM+GW4869 2	GAPDH	UNKNOWN	SYBR	None	16.9006
	BMSCS+CM+GW4869 2	GAPDH	UNKNOWN	SYBR	None	17.2867
	BMSCS+CM+GW4869 3	ALP	UNKNOWN	SYBR	None	30.5313		12.5472	-1.13177	1.13177	2.19127	2.53741	0.309748
	BMSCS+CM+GW4869 3	ALP	UNKNOWN	SYBR	None	30.2667		12.2826	-1.39641	1.39641	2.63246
	BMSCS+CM+GW4869 3	ALP	UNKNOWN	SYBR	None	30.1836		12.1995	-1.47949	1.47949	2.78849
	BMSCS+CM+GW4869 3	GAPDH	UNKNOWN	SYBR	None	18.2865	17.9841
	BMSCS+CM+GW4869 3	GAPDH	UNKNOWN	SYBR	None	17.7712
	BMSCS+CM+GW4869 3	GAPDH	UNKNOWN	SYBR	None	17.8946
	BMSCS+CM 1	ALP	UNKNOWN	SYBR	None	29.7873		12.4814	-1.19759	1.19759	2.29356	2.0125	0.246503		1.93189	0.151181	1.93	0.15	±	1.93±0.15
	BMSCS+CM 1	ALP	UNKNOWN	SYBR	None	30.1107		12.8048	-0.874225	0.874225	1.83302
	BMSCS+CM 1	ALP	UNKNOWN	SYBR	None	30.0506		12.7447	-0.934267	0.934267	1.91092
	BMSCS+CM 1	GAPDH	UNKNOWN	SYBR	None	17.1122	17.3059
	BMSCS+CM 1	GAPDH	UNKNOWN	SYBR	None	17.4048
	BMSCS+CM 1	GAPDH	UNKNOWN	SYBR	None	17.4006
	BMSCS+CM 2	ALP	UNKNOWN	SYBR	None	29.7565		12.9075	-0.771484	0.771484	1.70702	1.75749	0.142107
	BMSCS+CM 2	ALP	UNKNOWN	SYBR	None	29.5884		12.7394	-0.93956	0.93956	1.91794
	BMSCS+CM 2	ALP	UNKNOWN	SYBR	None	29.8077		12.9587	-0.720282	0.720282	1.6475
	BMSCS+CM 2	GAPDH	UNKNOWN	SYBR	None	17.0332	16.849
	BMSCS+CM 2	GAPDH	UNKNOWN	SYBR	None	17.01
	BMSCS+CM 2	GAPDH	UNKNOWN	SYBR	None	16.5038
	BMSCS+CM 3	ALP	UNKNOWN	SYBR	None	29.7685		12.6561	-1.02286	1.02286	2.03195	2.02569	0.137839
	BMSCS+CM 3	ALP	UNKNOWN	SYBR	None	29.877		12.7646	-0.914433	0.914433	1.88483
	BMSCS+CM 3	ALP	UNKNOWN	SYBR	None	29.6802		12.5678	-1.11123	1.11123	2.16029
	BMSCS+CM 3	GAPDH	UNKNOWN	SYBR	None	16.6538	17.1124
	BMSCS+CM 3	GAPDH	UNKNOWN	SYBR	None	17.666
	BMSCS+CM 3	GAPDH	UNKNOWN	SYBR	None	17.0173

## Sheet: Runx2
	Figure 3C							10.8528
	Sample Name	Target Name	Task	Reporter	Quencher	Cт	GAPDH mean（ct）	ΔCT	ΔΔCT	负ΔΔCT	2-ΔΔCT	2-ΔΔCT Mean	Ct SD
	BMSCS+Com-Exo1	RUNX2	UNKNOWN	SYBR	None	28.561		10.802	-0.0508772	0.0508772	1.03589	1.00424	0.111127		0.981739	0.0476131	0.98	0.05	±	0.98±0.05
	BMSCS+Com-Exo1	RUNX2	UNKNOWN	SYBR	None	28.7951		11.0361	0.183253	-0.183253	0.880715
	BMSCS+Com-Exo1	RUNX2	UNKNOWN	SYBR	None	28.4795		10.7205	-0.132376	0.132376	1.0961
	BMSCS+Com-Exo1	GAPDH	UNKNOWN	SYBR	None	17.8566	17.759
	BMSCS+Com-Exo1	GAPDH	UNKNOWN	SYBR	None	17.7121
	BMSCS+Com-Exo1	GAPDH	UNKNOWN	SYBR	None	17.7085
	BMSCS+Com-Exo2	RUNX2	UNKNOWN	SYBR	None	28.198		10.6673	-0.185542	0.185542	1.13724	1.01393	0.136973
	BMSCS+Com-Exo2	RUNX2	UNKNOWN	SYBR	None	28.5902		11.0596	0.206723	-0.206723	0.866503
	BMSCS+Com-Exo2	RUNX2	UNKNOWN	SYBR	None	28.3296		10.7989	-0.0538853	0.0538853	1.03806
	BMSCS+Com-Exo2	GAPDH	UNKNOWN	SYBR	None	17.9834	17.5307
	BMSCS+Com-Exo2	GAPDH	UNKNOWN	SYBR	None	17.3676
	BMSCS+Com-Exo2	GAPDH	UNKNOWN	SYBR	None	17.2411
	BMSCS+Com-Exo3	RUNX2	UNKNOWN	SYBR	None	28.1656		11.0846	0.231738	-0.231738	0.851608	0.927046	0.139165
	BMSCS+Com-Exo3	RUNX2	UNKNOWN	SYBR	None	28.1822		11.1011	0.248302	-0.248302	0.841887
	BMSCS+Com-Exo3	RUNX2	UNKNOWN	SYBR	None	27.8127		10.7316	-0.121203	0.121203	1.08764
	BMSCS+Com-Exo3	GAPDH	UNKNOWN	SYBR	None	17.2053	17.081
	BMSCS+Com-Exo3	GAPDH	UNKNOWN	SYBR	None	17.1831
	BMSCS+Com-Exo3	GAPDH	UNKNOWN	SYBR	None	16.8547
	BMSCS+Inf-Exo1	RUNX2	UNKNOWN	SYBR	None	28.7157		11.3805	0.527665	-0.527665	0.693676	0.639614	0.0853626		0.65404	0.0913804	0.65	0.09	±	0.65±0.09
	BMSCS+Inf-Exo1	RUNX2	UNKNOWN	SYBR	None	28.7361		11.4008	0.548015	-0.548015	0.68396
	BMSCS+Inf-Exo1	RUNX2	UNKNOWN	SYBR	None	29.0738		11.7386	0.885751	-0.885751	0.541206
	BMSCS+Inf-Exo1	GAPDH	UNKNOWN	SYBR	None	17.2174	17.3352
	BMSCS+Inf-Exo1	GAPDH	UNKNOWN	SYBR	None	17.4575
	BMSCS+Inf-Exo1	GAPDH	UNKNOWN	SYBR	None	17.3308
	BMSCS+Inf-Exo2	RUNX2	UNKNOWN	SYBR	None	28.6141		11.4135	0.560705	-0.560705	0.677971	0.751775	0.0870948
	BMSCS+Inf-Exo2	RUNX2	UNKNOWN	SYBR	None	28.5084		11.3078	0.454992	-0.454992	0.729514
	BMSCS+Inf-Exo2	RUNX2	UNKNOWN	SYBR	None	28.2915		11.091	0.238137	-0.238137	0.84784
	BMSCS+Inf-Exo2	GAPDH	UNKNOWN	SYBR	None	17.102	17.2006
	BMSCS+Inf-Exo2	GAPDH	UNKNOWN	SYBR	None	17.0693
	BMSCS+Inf-Exo2	GAPDH	UNKNOWN	SYBR	None	17.4303
	BMSCS+Inf-Exo3	RUNX2	UNKNOWN	SYBR	None	28.471		11.3902	0.537366	-0.537366	0.689028	0.57073	0.102694
	BMSCS+Inf-Exo3	RUNX2	UNKNOWN	SYBR	None	28.8808		11.7999	0.947111	-0.947111	0.51867
	BMSCS+Inf-Exo3	RUNX2	UNKNOWN	SYBR	None	28.9207		11.8399	0.987095	-0.987095	0.504493
	BMSCS+Inf-Exo3	GAPDH	UNKNOWN	SYBR	None	17.2983	17.0808
	BMSCS+Inf-Exo3	GAPDH	UNKNOWN	SYBR	None	16.6779
	BMSCS+Inf-Exo3	GAPDH	UNKNOWN	SYBR	None	17.2662
	BMSCS+CM+GW4869 1	RUNX2	UNKNOWN	SYBR	None	27.3547		10.0213	-0.831522	0.831522	1.77956	1.60275	0.219591		1.7457	0.279724	1.75	0.28	±	1.75±0.28
	BMSCS+CM+GW4869 1	RUNX2	UNKNOWN	SYBR	None	27.4449		10.1115	-0.741352	0.741352	1.67174
	BMSCS+CM+GW4869 1	RUNX2	UNKNOWN	SYBR	None	27.7459		10.4125	-0.440367	0.440367	1.35695
	BMSCS+CM+GW4869 1	GAPDH	UNKNOWN	SYBR	None	17.6496	17.3334
	BMSCS+CM+GW4869 1	GAPDH	UNKNOWN	SYBR	None	17.4458
	BMSCS+CM+GW4869 1	GAPDH	UNKNOWN	SYBR	None	16.9049
	BMSCS+CM+GW4869 2	RUNX2	UNKNOWN	SYBR	None	27.2887		10.3055	-0.54734	0.54734	1.46139	1.56633	0.0970934
	BMSCS+CM+GW4869 2	RUNX2	UNKNOWN	SYBR	None	27.1719		10.1887	-0.664149	0.664149	1.58463
	BMSCS+CM+GW4869 2	RUNX2	UNKNOWN	SYBR	None	27.111		10.1278	-0.725061	0.725061	1.65297
	BMSCS+CM+GW4869 2	GAPDH	UNKNOWN	SYBR	None	16.7623	16.9832
	BMSCS+CM+GW4869 2	GAPDH	UNKNOWN	SYBR	None	16.9006
	BMSCS+CM+GW4869 2	GAPDH	UNKNOWN	SYBR	None	17.2867
	BMSCS+CM+GW4869 3	RUNX2	UNKNOWN	SYBR	None	27.8203		9.83615	-1.01668	1.01668	2.02326	2.06801	0.049457
	BMSCS+CM+GW4869 3	RUNX2	UNKNOWN	SYBR	None	27.7945		9.81043	-1.04241	1.04241	2.05966
	BMSCS+CM+GW4869 3	RUNX2	UNKNOWN	SYBR	None	27.7521		9.76802	-1.08482	1.08482	2.12111
	BMSCS+CM+GW4869 3	GAPDH	UNKNOWN	SYBR	None	18.2865	17.9841
	BMSCS+CM+GW4869 3	GAPDH	UNKNOWN	SYBR	None	17.7712
	BMSCS+CM+GW4869 3	GAPDH	UNKNOWN	SYBR	None	17.8946
	BMSCS+CM 1	RUNX2	UNKNOWN	SYBR	None	27.7258		10.4199	-0.43293	0.43293	1.34997	1.33369	0.105956		1.34936	0.0841234	1.35	0.08	±	1.35±0.08
	BMSCS+CM 1	RUNX2	UNKNOWN	SYBR	None	27.8712		10.5653	-0.287518	0.287518	1.22054
	BMSCS+CM 1	RUNX2	UNKNOWN	SYBR	None	27.6421		10.3362	-0.516587	0.516587	1.43057
	BMSCS+CM 1	GAPDH	UNKNOWN	SYBR	None	17.1122	17.3059
	BMSCS+CM 1	GAPDH	UNKNOWN	SYBR	None	17.4048
	BMSCS+CM 1	GAPDH	UNKNOWN	SYBR	None	17.4006
	BMSCS+CM 2	RUNX2	UNKNOWN	SYBR	None	27.4034		10.5544	-0.298442	0.298442	1.22982	1.27416	0.0683477
	BMSCS+CM 2	RUNX2	UNKNOWN	SYBR	None	27.2658		10.4168	-0.436028	0.436028	1.35287
	BMSCS+CM 2	RUNX2	UNKNOWN	SYBR	None	27.3917		10.5427	-0.31011	0.31011	1.2398
	BMSCS+CM 2	GAPDH	UNKNOWN	SYBR	None	17.0332	16.849
	BMSCS+CM 2	GAPDH	UNKNOWN	SYBR	None	17.01
	BMSCS+CM 2	GAPDH	UNKNOWN	SYBR	None	16.5038
	BMSCS+CM 3	RUNX2	UNKNOWN	SYBR	None	27.3322		10.2198	-0.633022	0.633022	1.55081	1.44021	0.0961743
	BMSCS+CM 3	RUNX2	UNKNOWN	SYBR	None	27.5045		10.3921	-0.46073	0.46073	1.37624
	BMSCS+CM 3	RUNX2	UNKNOWN	SYBR	None	27.4864		10.374	-0.478797	0.478797	1.39358
	BMSCS+CM 3	GAPDH	UNKNOWN	SYBR	None	16.6538	17.1124
	BMSCS+CM 3	GAPDH	UNKNOWN	SYBR	None	17.666
	BMSCS+CM 3	GAPDH	UNKNOWN	SYBR	None	17.0173

## Sheet: COL1
	Figure 3B							9.76518
	Sample Name	Target Name	Task	Reporter	Quencher	Cт	GAPDH mean（ct）	ΔCT	ΔΔCT	负ΔΔCT	2-ΔΔCT	2-ΔΔCT Mean	Ct SD
	BMSCS+Com-Exo1	COL1	UNKNOWN	SYBR	None	27.5544		9.79538	0.0301932	-0.0301932	0.979289	1.00028	0.0292772		1.04018	0.0997715	1.04	0.1	±	1.04±0.1
	BMSCS+Com-Exo1	COL1	UNKNOWN	SYBR	None	27.5419		9.78285	0.0176628	-0.0176628	0.987832
	BMSCS+Com-Exo1	COL1	UNKNOWN	SYBR	None	27.4764		9.71733	-0.047856	0.047856	1.03373
	BMSCS+Com-Exo1	GAPDH	UNKNOWN	SYBR	None	17.8566	17.759
	BMSCS+Com-Exo1	GAPDH	UNKNOWN	SYBR	None	17.7121
	BMSCS+Com-Exo1	GAPDH	UNKNOWN	SYBR	None	17.7085
	BMSCS+Com-Exo2	COL1	UNKNOWN	SYBR	None	27.4367		9.90599	0.140809	-0.140809	0.907011	0.966536	0.120743
	BMSCS+Com-Exo2	COL1	UNKNOWN	SYBR	None	27.1512		9.62051	-0.144678	0.144678	1.10548
	BMSCS+Com-Exo2	COL1	UNKNOWN	SYBR	None	27.4687		9.93799	0.17281	-0.17281	0.887113
	BMSCS+Com-Exo2	GAPDH	UNKNOWN	SYBR	None	17.9834	17.5307
	BMSCS+Com-Exo2	GAPDH	UNKNOWN	SYBR	None	17.3676
	BMSCS+Com-Exo2	GAPDH	UNKNOWN	SYBR	None	17.2411
	BMSCS+Com-Exo3	COL1	UNKNOWN	SYBR	None	26.6552		9.57419	-0.190995	0.190995	1.14155	1.15373	0.0395686
	BMSCS+Com-Exo3	COL1	UNKNOWN	SYBR	None	26.5857		9.50461	-0.260575	0.260575	1.19796
	BMSCS+Com-Exo3	COL1	UNKNOWN	SYBR	None	26.6806		9.59952	-0.165663	0.165663	1.12168
	BMSCS+Com-Exo3	GAPDH	UNKNOWN	SYBR	None	17.2053	17.081
	BMSCS+Com-Exo3	GAPDH	UNKNOWN	SYBR	None	17.1831
	BMSCS+Com-Exo3	GAPDH	UNKNOWN	SYBR	None	16.8547
	BMSCS+Inf-Exo1	COL1	UNKNOWN	SYBR	None	27.5359		10.2006	0.43543	-0.43543	0.739473	0.667853	0.0720398		0.694194	0.0610594	0.69	0.06	±	0.69±0.06
	BMSCS+Inf-Exo1	COL1	UNKNOWN	SYBR	None	27.681		10.3458	0.5806	-0.5806	0.668686
	BMSCS+Inf-Exo1	COL1	UNKNOWN	SYBR	None	27.8485		10.5133	0.748067	-0.748067	0.595401
	BMSCS+Inf-Exo1	GAPDH	UNKNOWN	SYBR	None	17.2174	17.3352
	BMSCS+Inf-Exo1	GAPDH	UNKNOWN	SYBR	None	17.4575
	BMSCS+Inf-Exo1	GAPDH	UNKNOWN	SYBR	None	17.3308
	BMSCS+Inf-Exo2	COL1	UNKNOWN	SYBR	None	27.5744		10.3739	0.608701	-0.608701	0.655787	0.650727	0.0909165
	BMSCS+Inf-Exo2	COL1	UNKNOWN	SYBR	None	27.809		10.6084	0.843252	-0.843252	0.557386
	BMSCS+Inf-Exo2	COL1	UNKNOWN	SYBR	None	27.4021		10.2015	0.436339	-0.436339	0.739007
	BMSCS+Inf-Exo2	GAPDH	UNKNOWN	SYBR	None	17.102	17.2006
	BMSCS+Inf-Exo2	GAPDH	UNKNOWN	SYBR	None	17.0693
	BMSCS+Inf-Exo2	GAPDH	UNKNOWN	SYBR	None	17.4303
	BMSCS+Inf-Exo3	COL1	UNKNOWN	SYBR	None	27.3993		10.3185	0.553284	-0.553284	0.681467	0.764003	0.0763627
	BMSCS+Inf-Exo3	COL1	UNKNOWN	SYBR	None	27.1111		10.0303	0.265095	-0.265095	0.832144
	BMSCS+Inf-Exo3	COL1	UNKNOWN	SYBR	None	27.2074		10.1266	0.361422	-0.361422	0.778397
	BMSCS+Inf-Exo3	GAPDH	UNKNOWN	SYBR	None	17.2983	17.0808
	BMSCS+Inf-Exo3	GAPDH	UNKNOWN	SYBR	None	16.6779
	BMSCS+Inf-Exo3	GAPDH	UNKNOWN	SYBR	None	17.2662
	BMSCS+CM+GW4869 1	COL1	UNKNOWN	SYBR	None	25.7385		8.40508	-1.36011	1.36011	2.56705	2.40346	0.349996		2.24557	0.173409	2.25	0.17	±	2.25±0.17
	BMSCS+CM+GW4869 1	COL1	UNKNOWN	SYBR	None	25.6971		8.36371	-1.40148	1.40148	2.64172
	BMSCS+CM+GW4869 1	COL1	UNKNOWN	SYBR	None	26.0974		8.76401	-1.00118	1.00118	2.00163
	BMSCS+CM+GW4869 1	GAPDH	UNKNOWN	SYBR	None	17.6496	17.3334
	BMSCS+CM+GW4869 1	GAPDH	UNKNOWN	SYBR	None	17.4458
	BMSCS+CM+GW4869 1	GAPDH	UNKNOWN	SYBR	None	16.9049
	BMSCS+CM+GW4869 2	COL1	UNKNOWN	SYBR	None	25.757		8.77377	-0.991412	0.991412	1.98813	2.05998	0.063394
	BMSCS+CM+GW4869 2	COL1	UNKNOWN	SYBR	None	25.6892		8.70598	-1.0592	1.0592	2.08378
	BMSCS+CM+GW4869 2	COL1	UNKNOWN	SYBR	None	25.6725		8.68929	-1.0759	1.0759	2.10803
	BMSCS+CM+GW4869 2	GAPDH	UNKNOWN	SYBR	None	16.7623	16.9832
	BMSCS+CM+GW4869 2	GAPDH	UNKNOWN	SYBR	None	16.9006
	BMSCS+CM+GW4869 2	GAPDH	UNKNOWN	SYBR	None	17.2867
	BMSCS+CM+GW4869 3	COL1	UNKNOWN	SYBR	None	26.3125		8.32841	-1.43677	1.43677	2.70714	2.27325	0.402749
	BMSCS+CM+GW4869 3	COL1	UNKNOWN	SYBR	None	26.6109		8.62685	-1.13833	1.13833	2.20126
	BMSCS+CM+GW4869 3	COL1	UNKNOWN	SYBR	None	26.8147		8.83059	-0.934594	0.934594	1.91135
	BMSCS+CM+GW4869 3	GAPDH	UNKNOWN	SYBR	None	18.2865	17.9841
	BMSCS+CM+GW4869 3	GAPDH	UNKNOWN	SYBR	None	17.7712
	BMSCS+CM+GW4869 3	GAPDH	UNKNOWN	SYBR	None	17.8946
	BMSCS+CM 1	COL1	UNKNOWN	SYBR	None	26.1311		8.82523	-0.93995	0.93995	1.91846	1.94367	0.095477		1.65016	0.274618	1.65	0.27	±	1.65±0.27
	BMSCS+CM 1	COL1	UNKNOWN	SYBR	None	26.036		8.73011	-1.03507	1.03507	2.04922
	BMSCS+CM 1	COL1	UNKNOWN	SYBR	None	26.1732		8.86731	-0.897874	0.897874	1.86332
	BMSCS+CM 1	GAPDH	UNKNOWN	SYBR	None	17.1122	17.3059
	BMSCS+CM 1	GAPDH	UNKNOWN	SYBR	None	17.4048
	BMSCS+CM 1	GAPDH	UNKNOWN	SYBR	None	17.4006
	BMSCS+CM 2	COL1	UNKNOWN	SYBR	None	26.2404		9.39141	-0.373772	0.373772	1.29574	1.39946	0.109333
	BMSCS+CM 2	COL1	UNKNOWN	SYBR	None	26.1401		9.29115	-0.474033	0.474033	1.38899
	BMSCS+CM 2	COL1	UNKNOWN	SYBR	None	26.0161		9.16715	-0.598031	0.598031	1.51365
	BMSCS+CM 2	GAPDH	UNKNOWN	SYBR	None	17.0332	16.849
	BMSCS+CM 2	GAPDH	UNKNOWN	SYBR	None	17.01
	BMSCS+CM 2	GAPDH	UNKNOWN	SYBR	None	16.5038
	BMSCS+CM 3	COL1	UNKNOWN	SYBR	None	26.1735		9.06109	-0.704091	0.704091	1.62912	1.60735	0.0259728
	BMSCS+CM 3	COL1	UNKNOWN	SYBR	None	26.1866		9.07425	-0.690937	0.690937	1.61433
	BMSCS+CM 3	COL1	UNKNOWN	SYBR	None	26.2189		9.10654	-0.658645	0.658645	1.5786
	BMSCS+CM 3	GAPDH	UNKNOWN	SYBR	None	16.6538	17.1124
	BMSCS+CM 3	GAPDH	UNKNOWN	SYBR	None	17.666
	BMSCS+CM 3	GAPDH	UNKNOWN	SYBR	None	17.0173

## Sheet: IL-6
	Figure 2D							5.63992
	Sample Name	Target Name	Task	Reporter	Quencher	Cт	GAPDH mean（ct）	ΔCT	ΔΔCT	负ΔΔCT	2-ΔΔCT	2-ΔΔCT Mean	Ct SD
	BMSCS+Com-Exo1	TNFα	UNKNOWN	SYBR	None	23.4874		5.72831	0.0883983	-0.0883983	0.940566	1.00207	0.0797135		1.02372	0.018933	1.02	0.02	±	1.02±0.02
	BMSCS+Com-Exo1	TNFα	UNKNOWN	SYBR	None	23.4377		5.67865	0.0387392	-0.0387392	0.973505
	BMSCS+Com-Exo1	TNFα	UNKNOWN	SYBR	None	23.2718		5.51278	-0.127138	0.127138	1.09212
	BMSCS+Com-Exo1	GAPDH	UNKNOWN	SYBR	None	17.8566	17.759
	BMSCS+Com-Exo1	GAPDH	UNKNOWN	SYBR	None	17.7121
	BMSCS+Com-Exo1	GAPDH	UNKNOWN	SYBR	None	17.7085
	BMSCS+Com-Exo2	TNFα	UNKNOWN	SYBR	None	23.3535		5.82281	0.182891	-0.182891	0.880936	1.03196	0.134738
	BMSCS+Com-Exo2	TNFα	UNKNOWN	SYBR	None	22.9817		5.45108	-0.188839	0.188839	1.13985
	BMSCS+Com-Exo2	TNFα	UNKNOWN	SYBR	None	23.0661		5.53545	-0.104469	0.104469	1.0751
	BMSCS+Com-Exo2	GAPDH	UNKNOWN	SYBR	None	17.9834	17.5307
	BMSCS+Com-Exo2	GAPDH	UNKNOWN	SYBR	None	17.3676
	BMSCS+Com-Exo2	GAPDH	UNKNOWN	SYBR	None	17.2411
	BMSCS+Com-Exo3	TNFα	UNKNOWN	SYBR	None	22.8029		5.72191	0.0819926	-0.0819926	0.944752	1.03714	0.143846
	BMSCS+Com-Exo3	TNFα	UNKNOWN	SYBR	None	22.7742		5.69312	0.0532044	-0.0532044	0.963793
	BMSCS+Com-Exo3	TNFα	UNKNOWN	SYBR	None	22.4545		5.37343	-0.266487	0.266487	1.20287
	BMSCS+Com-Exo3	GAPDH	UNKNOWN	SYBR	None	17.2053	17.081
	BMSCS+Com-Exo3	GAPDH	UNKNOWN	SYBR	None	17.1831
	BMSCS+Com-Exo3	GAPDH	UNKNOWN	SYBR	None	16.8547
	BMSCS+Inf-Exo1	TNFα	UNKNOWN	SYBR	None	21.795		4.45973	-1.18018	1.18018	2.26606	2.31604	0.343079		2.00171	0.272241	2	0.27	±	2±0.27
	BMSCS+Inf-Exo1	TNFα	UNKNOWN	SYBR	None	21.9747		4.63942	-1.0005	1.0005	2.00069
	BMSCS+Inf-Exo1	TNFα	UNKNOWN	SYBR	None	21.5522		4.21695	-1.42297	1.42297	2.68136
	BMSCS+Inf-Exo1	GAPDH	UNKNOWN	SYBR	None	17.2174	17.3352
	BMSCS+Inf-Exo1	GAPDH	UNKNOWN	SYBR	None	17.4575
	BMSCS+Inf-Exo1	GAPDH	UNKNOWN	SYBR	None	17.3308
	BMSCS+Inf-Exo2	TNFα	UNKNOWN	SYBR	None	22.011		4.81046	-0.82946	0.82946	1.77702	1.84058	0.10866
	BMSCS+Inf-Exo2	TNFα	UNKNOWN	SYBR	None	22.0097		4.80912	-0.830797	0.830797	1.77867
	BMSCS+Inf-Exo2	TNFα	UNKNOWN	SYBR	None	21.8652		4.66462	-0.975294	0.975294	1.96604
	BMSCS+Inf-Exo2	GAPDH	UNKNOWN	SYBR	None	17.102	17.2006
	BMSCS+Inf-Exo2	GAPDH	UNKNOWN	SYBR	None	17.0693
	BMSCS+Inf-Exo2	GAPDH	UNKNOWN	SYBR	None	17.4303
	BMSCS+Inf-Exo3	TNFα	UNKNOWN	SYBR	None	21.8211		4.74028	-0.89963	0.89963	1.86559	1.84853	0.113825
	BMSCS+Inf-Exo3	TNFα	UNKNOWN	SYBR	None	21.9323		4.85153	-0.788384	0.788384	1.72714
	BMSCS+Inf-Exo3	TNFα	UNKNOWN	SYBR	None	21.7551		4.67432	-0.965591	0.965591	1.95286
	BMSCS+Inf-Exo3	GAPDH	UNKNOWN	SYBR	None	17.2983	17.0808
	BMSCS+Inf-Exo3	GAPDH	UNKNOWN	SYBR	None	16.6779
	BMSCS+Inf-Exo3	GAPDH	UNKNOWN	SYBR	None	17.2662
	BMSCS+CM+GW4869 1	TNFα	UNKNOWN	SYBR	None	24.058		6.72454	1.08463	-1.08463	0.471514	0.485821	0.0266512		0.532396	0.0703926	0.53	0.07	±	0.53±0.07
	BMSCS+CM+GW4869 1	TNFα	UNKNOWN	SYBR	None	24.0645		6.73109	1.09118	-1.09118	0.469379
	BMSCS+CM+GW4869 1	TNFα	UNKNOWN	SYBR	None	23.9263		6.59288	0.952963	-0.952963	0.516571
	BMSCS+CM+GW4869 1	GAPDH	UNKNOWN	SYBR	None	17.6496	17.3334
	BMSCS+CM+GW4869 1	GAPDH	UNKNOWN	SYBR	None	17.4458
	BMSCS+CM+GW4869 1	GAPDH	UNKNOWN	SYBR	None	16.9049
	BMSCS+CM+GW4869 2	TNFα	UNKNOWN	SYBR	None	23.8395		6.85625	1.21633	-1.21633	0.430375	0.497992	0.0737999
	BMSCS+CM+GW4869 2	TNFα	UNKNOWN	SYBR	None	23.6615		6.67826	1.03834	-1.03834	0.486887
	BMSCS+CM+GW4869 2	TNFα	UNKNOWN	SYBR	None	23.4172		6.43398	0.794067	-0.794067	0.576716
	BMSCS+CM+GW4869 2	GAPDH	UNKNOWN	SYBR	None	16.7623	16.9832
	BMSCS+CM+GW4869 2	GAPDH	UNKNOWN	SYBR	None	16.9006
	BMSCS+CM+GW4869 2	GAPDH	UNKNOWN	SYBR	None	17.2867
	BMSCS+CM+GW4869 3	TNFα	UNKNOWN	SYBR	None	24.1668		6.18266	0.542746	-0.542746	0.686463	0.613374	0.0700903
	BMSCS+CM+GW4869 3	TNFα	UNKNOWN	SYBR	None	24.3444		6.36031	0.720396	-0.720396	0.606931
	BMSCS+CM+GW4869 3	TNFα	UNKNOWN	SYBR	None	24.4951		6.51102	0.871107	-0.871107	0.546727
	BMSCS+CM+GW4869 3	GAPDH	UNKNOWN	SYBR	None	18.2865	17.9841
	BMSCS+CM+GW4869 3	GAPDH	UNKNOWN	SYBR	None	17.7712
	BMSCS+CM+GW4869 3	GAPDH	UNKNOWN	SYBR	None	17.8946
	BMSCS+CM 1	TNFα	UNKNOWN	SYBR	None	23.6151		6.30919	0.669276	-0.669276	0.628822	0.715533	0.103197		0.703124	0.0543629	0.7	0.05	±	0.7±0.05
	BMSCS+CM 1	TNFα	UNKNOWN	SYBR	None	23.2152		5.9093	0.269383	-0.269383	0.829674
	BMSCS+CM 1	TNFα	UNKNOWN	SYBR	None	23.4851		6.17922	0.539302	-0.539302	0.688104
	BMSCS+CM 1	GAPDH	UNKNOWN	SYBR	None	17.1122	17.3059
	BMSCS+CM 1	GAPDH	UNKNOWN	SYBR	None	17.4048
	BMSCS+CM 1	GAPDH	UNKNOWN	SYBR	None	17.4006
	BMSCS+CM 2	TNFα	UNKNOWN	SYBR	None	23.1852		6.33622	0.696302	-0.696302	0.617152	0.643629	0.0907179
	BMSCS+CM 2	TNFα	UNKNOWN	SYBR	None	22.9143		6.0653	0.425386	-0.425386	0.74464
	BMSCS+CM 2	TNFα	UNKNOWN	SYBR	None	23.3022		6.45317	0.813258	-0.813258	0.569095
	BMSCS+CM 2	GAPDH	UNKNOWN	SYBR	None	17.0332	16.849
	BMSCS+CM 2	GAPDH	UNKNOWN	SYBR	None	17.01
	BMSCS+CM 2	GAPDH	UNKNOWN	SYBR	None	16.5038
	BMSCS+CM 3	TNFα	UNKNOWN	SYBR	None	23.3353		6.22292	0.583	-0.583	0.667574	0.750209	0.0850687
	BMSCS+CM 3	TNFα	UNKNOWN	SYBR	None	23.0081		5.89572	0.255807	-0.255807	0.837519
	BMSCS+CM 3	TNFα	UNKNOWN	SYBR	None	23.176		6.06357	0.423654	-0.423654	0.745534
	BMSCS+CM 3	GAPDH	UNKNOWN	SYBR	None	16.6538	17.1124
	BMSCS+CM 3	GAPDH	UNKNOWN	SYBR	None	17.666
	BMSCS+CM 3	GAPDH	UNKNOWN	SYBR	None	17.0173

## Sheet: TNFα
	Figure 2C							8.78079
	Sample Name	Target Name	Task	Reporter	Quencher	Cт	GAPDH mean（ct）	ΔCT	ΔΔCT	负ΔΔCT	2-ΔΔCT	2-ΔΔCT Mean	Ct SD
	BMSCS+Com-Exo1	TNFα	UNKNOWN	SYBR	None	26.5365		8.77747	-0.00331929	0.00331929	1.0023	1.00083	0.0500086		0.994803	0.048742	0.99	0.05	±	0.99±0.05
	BMSCS+Com-Exo1	TNFα	UNKNOWN	SYBR	None	26.6137		8.85463	0.0738364	-0.0738364	0.950108
	BMSCS+Com-Exo1	TNFα	UNKNOWN	SYBR	None	26.4693		8.71027	-0.0705171	0.0705171	1.05009
	BMSCS+Com-Exo1	GAPDH	UNKNOWN	SYBR	None	17.8566	17.759
	BMSCS+Com-Exo1	GAPDH	UNKNOWN	SYBR	None	17.7121
	BMSCS+Com-Exo1	GAPDH	UNKNOWN	SYBR	None	17.7085
	BMSCS+Com-Exo2	TNFα	UNKNOWN	SYBR	None	26.5642		9.03357	0.252782	-0.252782	0.839276	0.943325	0.100358
	BMSCS+Com-Exo2	TNFα	UNKNOWN	SYBR	None	26.2555		8.72486	-0.0559333	0.0559333	1.03953
	BMSCS+Com-Exo2	TNFα	UNKNOWN	SYBR	None	26.3837		8.85302	0.072227	-0.072227	0.951169
	BMSCS+Com-Exo2	GAPDH	UNKNOWN	SYBR	None	17.9834	17.5307
	BMSCS+Com-Exo2	GAPDH	UNKNOWN	SYBR	None	17.3676
	BMSCS+Com-Exo2	GAPDH	UNKNOWN	SYBR	None	17.2411
	BMSCS+Com-Exo3	TNFα	UNKNOWN	SYBR	None	25.8107		8.72966	-0.0511322	0.0511322	1.03608	1.04025	0.0236107
	BMSCS+Com-Exo3	TNFα	UNKNOWN	SYBR	None	25.8347		8.75364	-0.027154	0.027154	1.019
	BMSCS+Com-Exo3	TNFα	UNKNOWN	SYBR	None	25.7701		8.68904	-0.0917551	0.0917551	1.06567
	BMSCS+Com-Exo3	GAPDH	UNKNOWN	SYBR	None	17.2053	17.081
	BMSCS+Com-Exo3	GAPDH	UNKNOWN	SYBR	None	17.1831
	BMSCS+Com-Exo3	GAPDH	UNKNOWN	SYBR	None	16.8547
	BMSCS+Inf-Exo1	TNFα	UNKNOWN	SYBR	None	24.898		7.56275	-1.21804	1.21804	2.3263	2.4071	0.192007		2.15668	0.225976	2.16	0.23	±	2.16±0.23
	BMSCS+Inf-Exo1	TNFα	UNKNOWN	SYBR	None	24.9342		7.59893	-1.18186	1.18186	2.26869
	BMSCS+Inf-Exo1	TNFα	UNKNOWN	SYBR	None	24.723		7.38776	-1.39303	1.39303	2.6263
	BMSCS+Inf-Exo1	GAPDH	UNKNOWN	SYBR	None	17.2174	17.3352
	BMSCS+Inf-Exo1	GAPDH	UNKNOWN	SYBR	None	17.4575
	BMSCS+Inf-Exo1	GAPDH	UNKNOWN	SYBR	None	17.3308
	BMSCS+Inf-Exo2	TNFα	UNKNOWN	SYBR	None	24.9744		7.77387	-1.00692	1.00692	2.00961	1.96795	0.0806403
	BMSCS+Inf-Exo2	TNFα	UNKNOWN	SYBR	None	24.9675		7.76698	-1.01381	1.01381	2.01924
	BMSCS+Inf-Exo2	TNFα	UNKNOWN	SYBR	None	25.0744		7.8739	-0.906894	0.906894	1.875
	BMSCS+Inf-Exo2	GAPDH	UNKNOWN	SYBR	None	17.102	17.2006
	BMSCS+Inf-Exo2	GAPDH	UNKNOWN	SYBR	None	17.0693
	BMSCS+Inf-Exo2	GAPDH	UNKNOWN	SYBR	None	17.4303
	BMSCS+Inf-Exo3	TNFα	UNKNOWN	SYBR	None	24.7684		7.6876	-1.09319	1.09319	2.13345	2.095	0.05254
	BMSCS+Inf-Exo3	TNFα	UNKNOWN	SYBR	None	24.8365		7.75567	-1.02512	1.02512	2.03513
	BMSCS+Inf-Exo3	TNFα	UNKNOWN	SYBR	None	24.78		7.69917	-1.08162	1.08162	2.11641
	BMSCS+Inf-Exo3	GAPDH	UNKNOWN	SYBR	None	17.2983	17.0808
	BMSCS+Inf-Exo3	GAPDH	UNKNOWN	SYBR	None	16.6779
	BMSCS+Inf-Exo3	GAPDH	UNKNOWN	SYBR	None	17.2662
	BMSCS+CM+GW4869 1	TNFα	UNKNOWN	SYBR	None	27.1083		9.77485	0.994061	-0.994061	0.502063	0.467485	0.0346079		0.424133	0.0818302	0.42	0.08	±	0.42±0.08
	BMSCS+CM+GW4869 1	TNFα	UNKNOWN	SYBR	None	27.3223		9.98886	1.20807	-1.20807	0.432847
	BMSCS+CM+GW4869 1	TNFα	UNKNOWN	SYBR	None	27.211		9.87761	1.09682	-1.09682	0.467545
	BMSCS+CM+GW4869 1	GAPDH	UNKNOWN	SYBR	None	17.6496	17.3334
	BMSCS+CM+GW4869 1	GAPDH	UNKNOWN	SYBR	None	17.4458
	BMSCS+CM+GW4869 1	GAPDH	UNKNOWN	SYBR	None	16.9049
	BMSCS+CM+GW4869 2	TNFα	UNKNOWN	SYBR	None	27.2391		10.2559	1.47513	-1.47513	0.359702	0.329748	0.0273292
	BMSCS+CM+GW4869 2	TNFα	UNKNOWN	SYBR	None	27.3927		10.4095	1.62874	-1.62874	0.32337
	BMSCS+CM+GW4869 2	TNFα	UNKNOWN	SYBR	None	27.4716		10.4884	1.70759	-1.70759	0.306171
	BMSCS+CM+GW4869 2	GAPDH	UNKNOWN	SYBR	None	16.7623	16.9832
	BMSCS+CM+GW4869 2	GAPDH	UNKNOWN	SYBR	None	16.9006
	BMSCS+CM+GW4869 2	GAPDH	UNKNOWN	SYBR	None	17.2867
	BMSCS+CM+GW4869 3	TNFα	UNKNOWN	SYBR	None	27.7159		9.73176	0.950971	-0.950971	0.517284	0.475167	0.0445191
	BMSCS+CM+GW4869 3	TNFα	UNKNOWN	SYBR	None	27.8249		9.84079	1.06	-1.06	0.479633
	BMSCS+CM+GW4869 3	TNFα	UNKNOWN	SYBR	None	27.9872		10.0031	1.22235	-1.22235	0.428583
	BMSCS+CM+GW4869 3	GAPDH	UNKNOWN	SYBR	None	18.2865	17.9841
	BMSCS+CM+GW4869 3	GAPDH	UNKNOWN	SYBR	None	17.7712
	BMSCS+CM+GW4869 3	GAPDH	UNKNOWN	SYBR	None	17.8946
	BMSCS+CM 1	TNFα	UNKNOWN	SYBR	None	26.7363		9.43047	0.649676	-0.649676	0.637423	0.683087	0.0597299		0.593829	0.0800098	0.59	0.08	±	0.59±0.08
	BMSCS+CM 1	TNFα	UNKNOWN	SYBR	None	26.5004		9.19452	0.413725	-0.413725	0.750683
	BMSCS+CM 1	TNFα	UNKNOWN	SYBR	None	26.6836		9.37773	0.596938	-0.596938	0.661156
	BMSCS+CM 1	GAPDH	UNKNOWN	SYBR	None	17.1122	17.3059
	BMSCS+CM 1	GAPDH	UNKNOWN	SYBR	None	17.4048
	BMSCS+CM 1	GAPDH	UNKNOWN	SYBR	None	17.4006
	BMSCS+CM 2	TNFα	UNKNOWN	SYBR	None	26.5085		9.6595	0.878707	-0.878707	0.543855	0.569845	0.0833134
	BMSCS+CM 2	TNFα	UNKNOWN	SYBR	None	26.2226		9.37359	0.592798	-0.592798	0.663056
	BMSCS+CM 2	TNFα	UNKNOWN	SYBR	None	26.6222		9.77324	0.992444	-0.992444	0.502626
	BMSCS+CM 2	GAPDH	UNKNOWN	SYBR	None	17.0332	16.849
	BMSCS+CM 2	GAPDH	UNKNOWN	SYBR	None	17.01
	BMSCS+CM 2	GAPDH	UNKNOWN	SYBR	None	16.5038
	BMSCS+CM 3	TNFα	UNKNOWN	SYBR	None	26.7748		9.6624	0.881605	-0.881605	0.542763	0.528554	0.0239816
	BMSCS+CM 3	TNFα	UNKNOWN	SYBR	None	26.8907		9.7783	0.997506	-0.997506	0.500865
	BMSCS+CM 3	TNFα	UNKNOWN	SYBR	None	26.7767		9.66434	0.883549	-0.883549	0.542032
	BMSCS+CM 3	GAPDH	UNKNOWN	SYBR	None	16.6538	17.1124
	BMSCS+CM 3	GAPDH	UNKNOWN	SYBR	None	17.666
	BMSCS+CM 3	GAPDH	UNKNOWN	SYBR	None	17.0173

## Sheet: Data analysis
					GROUP	ALP	Runx2	COL1	IL-6	TNFα
					BMSCS+Com-Exo	1±0.05	0.98±0.05	1.04±0.1	1.02±0.02	0.99±0.05
					BMSCS+Inf-Exo	0.54±0.06	0.65±0.09	0.69±0.06	2±0.27	2.16±0.23
					BMSCS+CM+GW4869	2.31±0.2	1.75±0.28	2.25±0.17	0.53±0.07	0.42±0.08
					BMSCS+CM	1.93±0.15	1.35±0.08	1.65±0.27	0.7±0.05	0.59±0.08
