# Supplementary material for: Lipopolysaccharide-activated macrophages regulate the osteogenic differentiation of bone marrow mesenchymal stem cells through exosomes
Source: PeerJ. 2022 May 13;10:e13442. doi: 10.7717/peerj.13442 (PMC9109694; doi:10.7717/peerj.13442)
Supplement: Supplemental Information 6 [file peerj-10-13442-s006.xls]

## Sheet: Protein Quantification
		Figure 3H
		Protein Quantification（ug）	OD
		0	0.1311
		2	0.2302
		4	0.3356
		6	0.3897
		8	0.4661
		10	0.5594
	Protein Quantification	sample	OD	Protein Quantification（ug）	On the sample volume（ul）	On the sample volume（mg/ml）
		50ug/mlExo-1	0.1822	0.906024	1	0.906024
		50ug/mlExo-2	0.1852	0.978313	1	0.978313
		50ug/mlExo-3	0.1812	0.881928	1	0.881928
		50ug/mlInf-Exo-1	0.1842	0.954217	1	0.954217
		50ug/mlInf-Exo-2	0.1829	0.922892	1	0.922892
		50ug/mlInf-Exo-3	0.1831	0.927711	1	0.927711
		GW4869+CM-1	0.1826	0.915663	1	0.915663
		GW4869+CM-2	0.1784	0.814458	1	0.814458
		GW4869+CM-3	0.1854	0.983133	1	0.983133
		CM-1	0.1824	0.910843	1	0.910843
		CM-2	0.1829	0.922892	1	0.922892
		CM-3	0.1831	0.927711	1	0.927711

## Sheet: ALP
		Figure 3I
		SAMPLE	OD	Protein concentrationmg/ml）	ALP(king unit/gprot)
校准	0.2958	50ug/mlExo-1-1	0.0709	0.906024	3.03132
空白	0.0351	50ug/mlExo-1-2	0.0708	0.906024	3.02286
		50ug/mlExo-1-3	0.0712	0.906024	3.05673
		50ug/mlExo-2-1	0.0725	0.978313	2.9328
		50ug/mlExo-2-2	0.0776	0.978313	3.33273
		50ug/mlExo-2-3	0.0725	0.978313	2.9328
		50ug/mlExo-3-1	0.0698	0.881928	3.01846
		50ug/mlExo-3-2	0.0716	0.881928	3.17504
		50ug/mlExo-3-3	0.0693	0.881928	2.97497	3.05308
		50ug/mlInf-Exo-1-1	0.0661	0.954217	2.49232
		50ug/mlInf-Exo-1-2	0.0727	0.954217	3.02294
		50ug/mlInf-Exo-1-3	0.0707	0.954217	2.86215
		50ug/mlInf-Exo-2-1	0.0642	0.922892	2.41897
		50ug/mlInf-Exo-2-2	0.0659	0.922892	2.56029
		50ug/mlInf-Exo-2-3	0.0674	0.922892	2.68498
		50ug/mlInf-Exo-3-1	0.0676	0.927711	2.68757
		50ug/mlInf-Exo-3-2	0.0723	0.927711	3.07623
		50ug/mlInf-Exo-3-3	0.0634	0.927711	2.34025	2.68286
		GW4869+CM-1-1	0.0769	0.915663	3.50211
		GW4869+CM-1-2	0.0756	0.915663	3.39319
		GW4869+CM-1-3	0.0745	0.915663	3.30103
		GW4869+CM-2-1	0.0792	0.814458	4.15393
		GW4869+CM-2-2	0.0768	0.814458	3.92786
		GW4869+CM-2-3	0.0787	0.814458	4.10683
		GW4869+CM-3-1	0.0809	0.983133	3.5739
		GW4869+CM-3-2	0.0842	0.983133	3.83141
		GW4869+CM-3-3	0.0797	0.983133	3.48026	3.69672
		CM-1-1	0.0755	0.910843	3.40272
		CM-1-2	0.0723	0.910843	3.1332
		CM-1-3	0.0788	0.910843	3.68067
		CM-2-1	0.0729	0.922892	3.14217
		CM2-2	0.0803	0.922892	3.75731
		CM-2-3	0.0736	0.922892	3.20036
		CM-3-1	0.0773	0.927711	3.48971
		CM-3-2	0.0738	0.927711	3.20027
		CM-3-3	0.0733	0.927711	3.15893	3.3517

## Sheet: Absorbance measured at 450nm
		Figure 3K
		Sample	Ord-Exo	Inf-Exo	CM+GW4869	CM
		OD	0.4317	0.2725	0.5769	0.4519
		OD	0.4772	0.3059	0.6373	0.5039
		OD	0.4375	0.2803	0.5827	0.4603
